# Supplementary material for: Characterization of the Burkholderia cenocepacia J2315 Surface-Exposed Immunoproteome
Source: MDPI journal article supplement (doi:10.3390/vaccines8030509), 2020-09-06
Supplement: s1 [file s1]

**Table S4.** Predicted surface-exposed proteins identified in *B. cenocepacia* J2315 by using the “surface shaving” strategy followed by LC-MS/MS (Threshold score:  $\geq 5$  peptides) and their predicted B cell epitopes.

| ORF      | Description                              | Peptides identified <sup>1</sup>                                                                                                                                                                                                                                                                                       | Predicted B cell epitopes <sup>2</sup>                                                                                                                                                                                                                                                                                                                                                                                                                                                                                                                                                                                                                                                                       | B cell epitopes average<br>(predicted peptides) <sup>2</sup> |
|----------|------------------------------------------|------------------------------------------------------------------------------------------------------------------------------------------------------------------------------------------------------------------------------------------------------------------------------------------------------------------------|--------------------------------------------------------------------------------------------------------------------------------------------------------------------------------------------------------------------------------------------------------------------------------------------------------------------------------------------------------------------------------------------------------------------------------------------------------------------------------------------------------------------------------------------------------------------------------------------------------------------------------------------------------------------------------------------------------------|--------------------------------------------------------------|
| BCAL0304 | VacJ-like lipoprotein                    | <sup>46</sup> FNDTVDTYALKPVAK <sup>60</sup><br><sup>96</sup> IADGVGDIMR <sup>105</sup><br><sup>195</sup> ANLLGAGDVLDAAALDK <sup>211</sup><br><sup>217</sup> NAYLQR <sup>222</sup><br><sup>232</sup> GEAAVTSNNDALPK <sup>245</sup>                                                                                      | <sup>27</sup> VQTPTKGDPLE <sup>37</sup><br><sup>125</sup> KLPKHTADF <sup>133</sup><br><sup>175</sup> YVKPDG <sup>180</sup><br><sup>194</sup> RANLLGAGDV <sup>203</sup>                                                                                                                                                                                                                                                                                                                                                                                                                                                                                                                                       | 0.469 (4)                                                    |
| BCAL0342 | Type VI secretion<br>system protein TssC | <sup>100</sup> GLDYLVK <sup>106</sup><br><sup>132</sup> GASEFDQSALFK <sup>143</sup><br><sup>237</sup> YVGLTLPR <sup>244</sup><br><sup>304</sup> GVEGGGLVEDLPTHTFK <sup>320</sup><br><sup>486</sup> LVADLPKPANS <sup>496</sup>                                                                                          | <sup>5</sup> TAAAQASGAEYAAGTSL <sup>21</sup><br><sup>27</sup> EKSKVAKSDSEHAR <sup>40</sup><br><sup>54</sup> DGTVIVSDN <sup>62</sup><br><sup>90</sup> EFQRLES <sup>96</sup><br><sup>109</sup> NTGQT <sup>113</sup><br><sup>127</sup> VRDFKGA SEFDQSAL <sup>141</sup><br><sup>143</sup> KKVYEEEFGTFGG <sup>155</sup><br><sup>167</sup> ISRQPED <sup>173</sup><br><sup>250</sup> PFNPKDGQTAENFNFVEDVDGTDH <sup>273</sup><br><sup>301</sup> AIRGVEGGGLVED <sup>313</sup><br><sup>320</sup> KTDDGEVALKCP <sup>331</sup><br><sup>337</sup> TDRREKE <sup>343</sup><br><sup>371</sup> KPKKYSTD SANA <sup>382</sup><br><sup>411</sup> IGSFASAQNVET <sup>422</sup><br><sup>431</sup> YVLLDDNASQEQAQFPLR <sup>449</sup> | 0.472 (15)                                                   |
| BCAL1288 | Family M23<br>peptidase                  | <sup>56</sup> WNQMTNPDAIEVGQVLR <sup>72</sup><br><sup>93</sup> ARPAPSAPVESAVK PATSIALIWPAAGNVV <sup>122</sup><br><sup>132</sup> GIDIANS PGTPVVAAPGVVVYAGNGLR <sup>159</sup><br><sup>160</sup> GYGNLIILK <sup>168</sup><br><sup>187</sup> EGQSVTQGQSIAEMGNSDSR <sup>207</sup><br><sup>208</sup> VALHFELR <sup>215</sup> | <sup>17</sup> LLVACGSAPVGP <sup>28</sup><br><sup>121</sup> VVRTFDGSK <sup>129</sup><br><sup>182</sup> ALLVKEGQSVTQ <sup>193</sup><br><sup>202</sup> NSDSR <sup>207</sup><br><sup>219</sup> RSIDP <sup>223</sup>                                                                                                                                                                                                                                                                                                                                                                                                                                                                                              | 0.513 (5)                                                    |
| BCAL1881 | Putative lipoprotein                     | <sup>59</sup> YLFSPVAVGDAVYAAGENG SVEK <sup>81</sup><br><sup>95</sup> VGSDLSAGVGS DGNLTAVGALK <sup>116</sup>                                                                                                                                                                                                           | <sup>25</sup> SSKDARRVPTPLTEFKPVMDV <sup>45</sup><br><sup>51</sup> ASVGKGG <sup>57</sup>                                                                                                                                                                                                                                                                                                                                                                                                                                                                                                                                                                                                                     | 0.444 (8)                                                    |

|          |                                |                                                                                                                                                                                                                                                                                                                                                                                              |                                                                                                                                                                                                                                                                                                                                     |            |
|----------|--------------------------------|----------------------------------------------------------------------------------------------------------------------------------------------------------------------------------------------------------------------------------------------------------------------------------------------------------------------------------------------------------------------------------------------|-------------------------------------------------------------------------------------------------------------------------------------------------------------------------------------------------------------------------------------------------------------------------------------------------------------------------------------|------------|
| BCAL1893 | Family M23<br>peptidase        | <sup>117</sup> GGV FVLGP D G K <sup>127</sup><br><sup>153</sup> TIDGQVIAFNAQTGEQK <sup>169</sup><br><sup>350</sup> TDGSAITAAPVLAGNTLVVQTK <sup>371</sup>                                                                                                                                                                                                                                     | <sup>91</sup> WRSKVG S <sup>97</sup><br><sup>127</sup> KQLWKTSVQ <sup>135</sup><br><sup>167</sup> EQKWN YRNRAVPLNLRV <sup>183</sup><br><sup>217</sup> QTPVSFPKGVTEVERIND <sup>234</sup><br><sup>263</sup> GRPLWEKPFSSRSGLAQ <sup>279</sup><br><sup>302</sup> NQLWRNDKLKSR <sup>313</sup>                                            | 0.523 (4)  |
|          |                                | <sup>51</sup> SGSLGTTATAQPAVPLGPPPPGFYR <sup>75</sup><br><sup>95</sup> DIASWNNLANPNQIEVDQLLR <sup>115</sup><br><sup>188</sup> GPVLNGFDDAK <sup>198</sup><br><sup>199</sup> NKGVNIGGTAGEAVK <sup>213</sup><br><sup>220</sup> VVYSGNGLR <sup>228</sup><br><sup>238</sup> HDATYLTAYAHNR <sup>250</sup><br><sup>266</sup> IAEMGNSDADR <sup>276</sup><br><sup>286</sup> QGKPV DPLK <sup>294</sup> | <sup>5</sup> SMLRAMQNNRSREPLTLA <sup>22</sup><br><sup>191</sup> LNGFDDAK <sup>198</sup><br><sup>251</sup> ALMVKEGDAVTK <sup>262</sup><br><sup>287</sup> GKPV DPLKY <sup>295</sup>                                                                                                                                                   |            |
| BCAL1985 | Putative exported<br>isomerase | <sup>38</sup> ADAMVAQLVQQGQTDGPQLQQAVR <sup>61</sup><br><sup>68</sup> EILMQE AIR <sup>76</sup><br><sup>87</sup> AQVAVAQQTVVLR <sup>99</sup><br><sup>186</sup> AYVPEFAAAAQK <sup>197</sup><br><sup>235</sup> AQIAQQLVQQK <sup>245</sup><br><sup>246</sup> LQAFEEGLR <sup>254</sup>                                                                                                            | <sup>45</sup> LVQQGQTDGPQLQQAVRQELVNRE <sup>68</sup><br><sup>78</sup> GIPNRPD <sup>84</sup><br><sup>198</sup> LQKGQMTDT <sup>206</sup><br><sup>221</sup> DIRDIA PPPF <sup>230</sup><br><sup>240</sup> QLVQQKLQAFEEG <sup>252</sup>                                                                                                  | 0.494 (5)  |
|          |                                | <sup>13</sup> GLLNDAADSVQDPSR <sup>27</sup><br><sup>35</sup> ELDDSIGR <sup>42</sup><br><sup>43</sup> AENSLIEIAQVATQR <sup>58</sup><br><sup>78</sup> ALQGGDEALAR <sup>88</sup><br><sup>89</sup> EALAAQSNAEAER <sup>101</sup><br><sup>150</sup> DVAASALGGIGGK <sup>162</sup>                                                                                                                   | <sup>20</sup> DSVQDPSRD <sup>28</sup><br><sup>156</sup> LGGIGGKNLSEDFQKLEDK <sup>174</sup><br><sup>215</sup> AALKKQLD <sup>222</sup>                                                                                                                                                                                                |            |
| BCAL2022 | PspA/IM30 family<br>protein    | <sup>44</sup> VEAGSVFAYLPIK <sup>56</sup><br><sup>111</sup> EFDKDNLT K <sup>119</sup><br><sup>152</sup> GFYAAEVK <sup>159</sup><br><sup>226</sup> LTGDLEAVR <sup>234</sup><br><sup>319</sup> LGEYGYAFATVNAQPDIDQANH K <sup>341</sup><br><sup>342</sup> VNLNLVVDPSR <sup>352</sup>                                                                                                            | <sup>41</sup> LQRVEAGSV <sup>49</sup><br><sup>54</sup> PIKQGD TFTDDKAS <sup>67</sup><br><sup>111</sup> EFDKDNL <sup>117</sup><br><sup>124</sup> VGLADGRYYDKALVDKAEQ <sup>142</sup><br><sup>192</sup> NKAFSTSTLRDE <sup>203</sup><br><sup>360</sup> NVVGNT RTRDEV <sup>371</sup><br><sup>373</sup> RREM RQLESSWFDSNRL <sup>389</sup> | 0.488 (19) |
|          |                                |                                                                                                                                                                                                                                                                                                                                                                                              |                                                                                                                                                                                                                                                                                                                                     |            |

|          |                                  |                                                   |                                       |           |
|----------|----------------------------------|---------------------------------------------------|---------------------------------------|-----------|
| BCAL2645 | OmpA family protein              | 79LAPSAAQTGTQVTEQPDGSLK <sup>99</sup>             | 410VPVDGTN <sup>416</sup>             | 0.502 (4) |
|          |                                  | 161AQSVVNALVQR <sup>171</sup>                     | 426DEKPTGA <sup>432</sup>             |           |
|          |                                  | 178LSAQGMGASNPIADNATEAGR <sup>198</sup>           | 454DNVFGSGT <sup>461</sup>            |           |
|          |                                  | 203RVEIYLR <sup>209</sup>                         | 484YFTVDGIKR <sup>492</sup>           |           |
|          |                                  | 204VEIYLR <sup>209</sup>                          | 498YRTYQPLYYSTSSSFR <sup>513</sup>    |           |
| BCAL2958 | OmpA family protein              | 93ITYQADALFDFDK <sup>105</sup>                    | 574WSRDARDSALIPSRG <sup>588</sup>     | 0.512 (3) |
|          |                                  | 93ITYQADALFDFDKATLKPLGK <sup>113</sup>            | 595IEYGVPVVGKIQ <sup>605</sup>        |           |
|          |                                  | 114QKLDELASK <sup>122</sup>                       | 611LQAQYYYSFS <sup>620</sup>          |           |
|          |                                  | 116LDELASK <sup>122</sup>                         | 634GNGIGNPYP <sup>642</sup>           |           |
|          |                                  | 123IEGMNTEVVVATGYTDR <sup>139</sup>               | 657GYEPSSLGPRDTKTNDPI <sup>674</sup>  |           |
| BCAL3204 | Putative OmpA family lipoprotein | 203RVEVEVVGTTQQVQK <sup>216</sup>                 | 712GNAPGGTSTGANG <sup>724</sup>       | 0.507 (3) |
|          |                                  | 204VEVEVVGTTQQVQK <sup>216</sup>                  | 751QKHEGDQYQ <sup>759</sup>           |           |
|          |                                  | 31ANNAGAVSTQPSADNVAQNVNDPLNDPNSPLAK <sup>63</sup> | 88TQVTEQ <sup>93</sup>                |           |
|          |                                  | 65SIYDFDYSYSVK <sup>76</sup>                      | 109ATNQYAITPA <sup>118</sup>          |           |
|          |                                  | 97HVLIQGNTER <sup>107</sup>                       | 145DSTGSAQLNQTL <sup>156</sup>        |           |
| BCAL3311 | BcnA                             | 108GTSEYNLALGQK <sup>119</sup>                    | 183MGASNPIADNATEAGRAQN <sup>201</sup> | 0.455 (3) |
|          |                                  | 127AMALLGVNDSQMEAVSLGK <sup>145</sup>             | 101FDFDKATLKPLGKQ <sup>114</sup>      |           |
|          |                                  | 146EKPQATGHDEASWAQNR <sup>162</sup>               | 139RIGSDKYNDRL <sup>149</sup>         |           |
|          |                                  | 41QMNVPTEGAFFK <sup>52</sup>                      | 211TQQVQKTTV <sup>219</sup>           |           |
|          |                                  | 41QMNVPTEGAFFK <sup>51</sup>                      | 67YDFDYSYSVKDEYQP <sup>81</sup>       |           |
|          |                                  | 64AAQGSAQMTIDVASFDLGDK <sup>83</sup>              | 105DERGTSEYNLAL <sup>116</sup>        |           |
|          |                                  |                                                   | 143LGKEKPQATGHDEASWAQN <sup>161</sup> |           |
|          |                                  |                                                   | 21SGAAHADV <sup>28</sup>              |           |
|          |                                  |                                                   | 78FDLGDKMYNDQVAGKDWFDAK <sup>98</sup> |           |
|          |                                  |                                                   | 158AFNVGTGEWKDTSIVA <sup>173</sup>    |           |

|          |                                                              |                                                  |            |  |
|----------|--------------------------------------------------------------|--------------------------------------------------|------------|--|
| BCAM1931 | Putative porin                                               | 84MYNDQVAGK <sup>92</sup>                        |            |  |
|          |                                                              | 93DWFDAK <sup>98</sup>                           |            |  |
|          |                                                              | 99TYPQATFVSSAIAPAGGNK <sup>117</sup>             |            |  |
|          |                                                              | 128GKAETVTVPTVAQNGATQTFDGVLPK <sup>155</sup>     |            |  |
|          |                                                              | 128GKAETVTVPTVAQNGATQTFDGVLPK <sup>156</sup>     |            |  |
|          |                                                              | 130AETVTVPTVAQNGATQTFDGVLPK <sup>155</sup>       |            |  |
|          |                                                              | 157SAFNVTGEWK <sup>167</sup>                     |            |  |
|          |                                                              | 168DTSIVADEVQIK <sup>179</sup>                   |            |  |
|          |                                                              | 180FHLVATK <sup>186</sup>                        |            |  |
|          |                                                              | 44SLWSMGSGIDQSR <sup>56</sup>                    |            |  |
| BCAM2549 | Multidrug efflux<br>system outer<br>membrane protein<br>OpcM | 61GSEDLGGLK <sup>70</sup>                        |            |  |
|          |                                                              | 86LGNNGGMFNR <sup>95</sup>                       |            |  |
|          |                                                              | 96QAFVGLSSQYGTVTLGK <sup>112</sup>               |            |  |
|          |                                                              | 144LSTNGDVALNNSIK <sup>157</sup>                 |            |  |
|          |                                                              | 185AYSGGLSYQFQGLK <sup>198</sup>                 |            |  |
|          |                                                              | 199LGAAYSQANLGDGTNANGATNIAAQGR <sup>225</sup>    |            |  |
|          |                                                              | 263ADNYEVNAK <sup>271</sup>                      |            |  |
|          |                                                              | 272YNLTPALGLGAAYTYTNAK <sup>290</sup>            |            |  |
|          |                                                              | 313TDVYAQAVYQR <sup>323</sup>                    |            |  |
|          |                                                              | 327NAGGASIYNGDLSTAPSSSINQTAATVGLR <sup>356</sup> |            |  |
| BCAM2761 | Giant cable pilus                                            | 80LATAPALKNQTSFGAAEIPLSVK <sup>102</sup>         |            |  |
|          |                                                              | 88NQTSFGAAEIPLSVK <sup>102</sup>                 |            |  |
|          |                                                              | 36YQSNVASKSLWSMGSGID <sup>53</sup>               |            |  |
|          |                                                              | 63EDLGGG <sup>68</sup>                           |            |  |
|          |                                                              | 79FNIGNGRLGNNGGMF <sup>93</sup>                  |            |  |
|          |                                                              | 173SFSNNQNFGNNRA <sup>185</sup>                  |            |  |
|          |                                                              | 192YQFQG <sup>196</sup>                          | 0.503 (10) |  |
|          |                                                              | 205QANLGDGTNANGATNIAAQGRV <sup>226</sup>         |            |  |
|          |                                                              | 248QSRIDNRAAGVPSLRADN <sup>265</sup>             |            |  |
|          |                                                              | 272YNLTPA <sup>277</sup>                         |            |  |
| BCAM2761 | Giant cable pilus                                            | 287TNAKVDGSSAHW <sup>298</sup>                   |            |  |
|          |                                                              | 323RASKNAGGASIYNGDLSTAPSSSI <sup>346</sup>       |            |  |
|          |                                                              | 4DRKMDNMHNTNGLMR <sup>18</sup>                   |            |  |
|          |                                                              | 175RVGRNVEASRADQAQSEAL <sup>193</sup>            |            |  |
|          |                                                              | 264AVGVARRRAA <sup>273</sup>                     |            |  |
|          |                                                              | 286PADFAFKETPIVPVAVKIPPGL <sup>307</sup>         |            |  |
|          |                                                              | 316PDVSA <sup>320</sup>                          |            |  |
|          |                                                              | 332IGLAKSAYFPK <sup>342</sup>                    | 0.521 (11) |  |
|          |                                                              | 346TGSFGYEASTLGNLFLWSSRTFLG <sup>370</sup>       |            |  |
|          |                                                              | 421ADLRLDDQIRAQEA AVNASRRAAT <sup>445</sup>      |            |  |
| BCAM2761 | Giant cable pilus                                            | 448RTQYQEGEVAYL <sup>459</sup>                   |            |  |
|          |                                                              | 466RSVLQSQLQANQ <sup>477</sup>                   |            |  |
|          |                                                              | 495GGWGNAPAPTAVGDAASGKAD <sup>515</sup>          |            |  |
|          |                                                              | 67IFTNDKAKD <sup>75</sup>                        |            |  |
|          |                                                              | 85ALKNQTSFGAA <sup>95</sup>                      | 0.501 (2)  |  |

<sup>103</sup>LGETELTTTAATLK<sup>116</sup>

<sup>117</sup>TAEFPGELAQQSNVLALSIGQK<sup>139</sup>

<sup>140</sup>KVEAVTASGSYQGLVSVIVTQSAASGS<sup>166</sup>

---

<sup>1</sup> Peptides identified using surface-shaving with trypsin and LC-MS/MS analysis. <sup>2</sup> <http://tools.iedb.org/bcell/>. Threshold used of 0.5. Peptides shorter than 5 or larger than 25 amino acids were not considered. At bold are the predicted B cell epitopes found by the Surface-shaving approach.
